1 ***Artemisia annua* and *Artemisia afra* extracts exhibit strong bactericidal activity**  
2 **against *Mycobacterium tuberculosis***

3 Maria Carla Martini<sup>a</sup>, Tianbi Zhang<sup>a</sup>, John T. Williams<sup>b</sup>, Robert B. Abramovitch<sup>b</sup>, Pamela J.  
4 Weathers<sup>a</sup>, and Scarlet S. Shell<sup>a\*</sup>.

5 **a.** Department of Biology and Biotechnology, Worcester Polytechnic Institute, Worcester, MA,  
6 USA.

7 **b.** Department of Microbiology and Molecular Genetics, Michigan State University, East Lansing,  
8 Michigan, USA.

9 **\*Correspondence:**

10 Dr. Scarlet Shell: [sshell@wpi.edu](mailto:sshell@wpi.edu)

11 **Keywords:** *Artemisia annua*, *Artemisia afra*, *Mycobacterium tuberculosis*, *Mycobacterium*  
12 *abscessus*, artemisinin, tuberculosis.

13 **Abbreviations:** Mtb, *Mycobacterium tuberculosis*; TB, tuberculosis; AN, artemisinin; MIC,  
14 minimum inhibitory concentration; OD, optical density; CFUs, colony forming units; DCM,  
15 dichloromethane.

16

17 **ABSTRACT**

18 **Ethnopharmacological relevance:** Emergence of drug-resistant and multidrug-resistant  
19 *Mycobacterium tuberculosis* (Mtb) strains is a major barrier to tuberculosis (TB) eradication, as it  
20 leads to longer treatment regimens and in many cases treatment failure. Thus, there is an urgent  
21 need to explore new TB drugs and combinations, in order to shorten TB treatment and improve  
22 outcomes. Here, we evaluate the potential of two medicinal plants, *Artemisia annua*, a natural  
23 source of artemisinin (AN), and *Artemisia afra*, as sources of novel antitubercular agents.

24 **Aim of the study:** Our goal was to measure the activity of *A. annua* and *A. afra* extracts against  
25 Mtb as potential natural and inexpensive therapies for TB treatment, or as sources of compounds  
26 that could be further developed into effective treatments.

27 **Materials and Methods:** The minimum inhibitory concentrations (MICs) of *A. annua* and *A. afra*  
28 dichloromethane extracts were determined, and concentrations above the MICs were used to  
29 evaluate their ability to kill Mtb and *Mycobacterium abscessus in vitro*.

30 **Results:** Previous studies showed that *A. annua* and *A. afra* inhibit Mtb growth. Here, we show  
31 for the first time that *Artemisia* extracts have a strong bactericidal activity against Mtb. The killing  
32 effect of *A. annua* was much stronger than equivalent concentrations of pure AN, suggesting that  
33 *A. annua* extracts kill Mtb through a combination of AN and additional compounds. *A. afra*, which  
34 produces very little AN, displayed bactericidal activity against Mtb that was substantial but weaker  
35 than that of *A. annua*. In addition, we measured the activity of *Artemisia* extracts against  
36 *Mycobacterium abscessus*. Interestingly, we observed that while *A. annua* is not bactericidal, it  
37 inhibits growth of *M. abscessus*, highlighting the potential of this plant in combinatory therapies  
38 to treat *M. abscessus* infections.

39 **Conclusion:** Our results indicate that *Artemisia* extracts have an enormous potential for treatment  
40 of TB and *M. abscessus* infections, and that these plants contain bactericidal compounds in  
41 addition to AN. Combination of extracts with existing antibiotics may not only improve treatment  
42 outcomes but also reduce the emergence of resistance to other drugs.

43

## 44 1. INTRODUCTION

45 3,000 years after the first documented case of tuberculosis (TB) (Barberis et al., 2017) and 130  
46 years after the discovery that *Mycobacterium tuberculosis* (Mtb) is the causative agent of TB, this  
47 disease remains one of the major worldwide health challenges. In 2018 alone, 10 million people  
48 fell ill with TB and 1.2 million died from the disease, positioning TB as one of the top 10 causes  
49 of death worldwide (WHO, 2019). A major barrier to lowering this number is the suboptimal  
50 nature of TB antibiotic therapies. Drug-sensitive TB must be treated with six months of  
51 combination therapy to prevent relapse and minimize the emergence of resistance. Drug-resistant

52 TB requires even longer treatment regimens with more debilitating side effects and poorer  
53 outcomes. Thus, better drugs and combinations are needed to make TB treatment faster and less  
54 toxic. Since the late 1970s, only four drugs (linezolid, bedaquiline, delamanid and pretomanid)  
55 have been made available as second-line antitubercular agents to treat multidrug-resistant and  
56 extensively drug-resistant TB (Keam, 2019; Lee et al., 2012; Osborne, 2013; Ryan and Lo, 2014).  
57 Despite the recent introduction of these antibiotics in TB treatment, bedaquiline and delamanid  
58 resistance have already been reported in *Mtb* clinical isolates (Mokrousov et al., 2019; Polsfuss et  
59 al., 2019), indicating that resistance emerges quickly and highlighting the urgent need to develop  
60 new drugs and combinations to improve TB therapy.

61 Recent work presented the antimalarial drug artemisinin (AN) as a promising antitubercular drug  
62 (Choi, 2017; Zheng et al., 2017). AN inhibits *Mtb* survival of hypoxia *in vitro* by blocking the  
63 DosRST two-component regulatory system, necessary for survival of *Mtb* during non-replicating  
64 persistence (Zheng et al., 2017; Zheng et al., 2019). It also has bactericidal activity against *Mtb*  
65 during aerated growth for reasons that are not fully elucidated but may involve lipid peroxidation  
66 (Patel et al., 2019). *Artemisia annua* is the natural source of AN, which was the scaffold for  
67 development of semi-synthetic derivatives now in widespread clinical use for treatment of malaria.  
68 Various *Artemisia* species are used in traditional medicine around the world, including use of *A.*  
69 *afra* in southern Africa to treat fever and cough, classic symptoms of TB (Thring and Weitz,  
70 2006). This traditional usage has prompted studies testing *Artemisia* extracts for activity against  
71 numerous pathogens and conditions, including mycobacteria in culture and in a murine model of  
72 tuberculosis (Cantrell et al., 1998; Uba et al., 2003). In addition, *A. afra*, which produces little to  
73 no AN, displayed inhibitory activity against *Mtb* (Mativandlela et al., 2008; Ntutela et al., 2009)  
74 suggesting that compounds other than AN in the extract can inhibit *Mtb* growth.

75 In the present study, we measured the ability of *A. annua* and *A. afra* extracts to kill *Mtb* in culture.  
76 We demonstrate that both extracts are strongly bactericidal against *Mtb* and produced more killing  
77 that equivalent concentrations of pure AN. We also tested the impact of these extracts on the  
78 emerging pathogen *M. abscessus* and the model organism *M. smegmatis*, and found that extracts  
79 inhibited growth but were not bactericidal at the concentrations tested.

80

## 81 2. MATERIALS AND METHODS

### 82 2.1 Strains and growth conditions

83 *M. tuberculosis* mc<sup>2</sup>6230 ( $\Delta$ *panCD*,  $\Delta$ RD1, (Sambandamurthy et al., 2006)) and virulent Erdman  
84 strains were grown in Middlebrook 7H9 supplemented with OADC (Oleic acid Albumin Dextrose  
85 Catalase, final concentrations 5 g/L bovine serum albumin fraction V, 2 g/L dextrose, 0.85 g/L  
86 sodium chloride, and 3 mg/L catalase), 0.2% glycerol and 0.05% Tween 80. For the Mtb mc<sup>2</sup>6230  
87 auxotrophic strain, pantothenate was added to a final concentration of 24  $\mu$ g/mL. Mtb mc<sup>2</sup>6230  
88 and Mtb Erdman were grown in BSL-2 and BSL-3 containments, respectively, in accordance with  
89 institutionally approved standard operating procedures established for these strains. *M. smegmatis*  
90 mc<sup>2</sup>155 and *M. abscessus* ATCC\_19977 strains were grown in Middlebrook 7H9 supplemented  
91 with ADC (Albumin Dextrose Catalase, final concentrations 5 g/L bovine serum albumin fraction  
92 V, 2 g/L dextrose, 0.85 g/L sodium chloride, and 3 mg/L catalase), 0.2% glycerol and 0.05%  
93 Tween 80. *M. abscessus* was grown in BSL-2 containment in accordance with institutionally  
94 approved standard operating procedures.

95 Middlebrook 7H10 OADC solid media supplemented with 0.2% glycerol was used to count colony  
96 forming units (CFUs) for all strains. 24  $\mu$ g/mL pantothenate was added to Mtb mc<sup>2</sup>6230 plates and  
97 10  $\mu$ g/mL cycloheximide was added to Mtb Erdman plates to prevent fungal contamination.

### 98 2.2 Preparation of plant extracts

99 Dried leaves of *A. annua* L. SAM cultivar (voucher MASS 00317314) and *A. afra* Jacq. ex Willd.  
100 (SEN) (voucher Université de Liège LG0019529) were used and their phytochemical contents are  
101 detailed in (Weathers and Towler, 2014) and (Munyangi et al., 2018), respectively. *A. annua* was  
102 propagated in-house and harvested as described (Towler and Weathers, 2015). Dried *A. afra* leaves  
103 were obtained from Guy Mergei, Université de Liège, Belgium. Dried leaf powder of *A. annua*  
104 and *A. afra* were resuspended in dichloromethane (1 g dried leaves per 20 mL DCM) and extracted  
105 under sonication as previously detailed (Desrosiers et al., 2020; Weathers et al., 2014). AN was  
106 quantified by GC-MS using the method described in Weathers and Towler (2014) with the  
107 following modifications: ion source temperature, 230°C; inlet, 150°C; transfer line, 280°C; oven  
108 temperature, 125°C held for 1 min, then increased to 240°C at 5°C/min, and then increased to

109 300°C at 30°C/min. *A. annua* and *A. afra* extracts used here contained 0.82% and  $\leq 0.026\%$  (w/w)  
110 of AN in dry weight, respectively. Dry extracts were sterilized by ethylene oxide, degassed for one  
111 day, stored at -20°C, and later resuspended in sterile DMSO for use in experiments.

### 112 **2.3 Determination of minimum inhibitory concentration (MIC)**

113 MICs of AN and *Artemisia* extracts in Mtb strain mc<sup>2</sup>6230 were determined by resazurin microtiter  
114 assay (REMA) as previously reported (Choi, 2017) with minor modifications. Briefly, Mtb log-  
115 phase cultures were adjusted to a final OD=0.001. Bacterial suspensions were inoculated into 96  
116 well microtiter plate containing final concentrations of i) 1.17-600  $\mu\text{g/mL}$  pure AN or ii) *A. annua*  
117 extract containing 1.17-600  $\mu\text{g/mL}$  AN or iii) *A. afra* extract made from equivalent dry weights as  
118 the *A. annua* extract. All wells contained 2.5% DMSO and final volumes were 200  $\mu\text{L}$ . Controls  
119 consisting of 7H9 medium alone or 7H9 medium + drug/extract or 7H9 medium + bacterial culture  
120 were included. Plates were covered with breathable paper and plastic lids, placed in plastic bags  
121 and incubated at 37°C and 125 rpm for 7 days. After this time, 20  $\mu\text{L}$  0.02% (w/v) resazurin  
122 solution was added to each well and incubated for 24h. A change in color from blue to pink  
123 indicated bacterial growth. The MIC was defined as the lowest concentration of drug/extract that  
124 prevented visible color change.

### 125 **2.4 Measurement of plant extract effects on mycobacterial viability**

126 For Mtb mc<sup>2</sup>6230, *M. abscessus*, and *M. smegmatis*, log-phase cultures were sub-cultured to an  
127 OD=0.1 and 5 mL aliquots were placed into 50 mL conical tubes. Pure AN, *A. afra*, or *A. annua*  
128 extracts were added to achieve the desired concentrations. Cultures containing 2.5% DMSO were  
129 included as a control. Cultures were allowed to grow at 37°C and 200 rpm for 14 days (Mtb) or 7  
130 days (*M. abscessus* and *M. smegmatis*). Samples from all treatments were collected at time 0 and  
131 at different timepoints and serial dilutions were plated on 7H10 to calculate the number of CFUs.  
132 The number of colonies was determined after 40 days (Mtb) or 3 days (*M. abscessus* and *M.*  
133 *smegmatis*) of incubation at 37°C. For Mtb Erdman strain, 30 mL of log-phase cultures were  
134 pelleted and resuspended in fresh 7H9 and 5 mL aliquots were placed in T-25 flasks and AN, *A.*  
135 *afra*, or *A. annua* were added. Cultures were incubated at 37°C (+5% CO<sub>2</sub>) in T-25 flasks without  
136 shaking for 12 days. CFUs were determined following the same procedure as with the other strains.

137

### 138 3. RESULTS AND DISCUSSION

139 In order to measure the potential of *Artemisia* extracts to kill Mtb, we first sought to determine the  
140 concentrations of pure AN and DCM extracts of *A. annua* and *A. afra* that inhibited growth of Mtb  
141 strain mc<sup>2</sup>6230. We found that the MIC for pure AN was 75 µg/mL. For *A. annua* the MIC was  
142 the extract from 4.81 mg of dried leaves per mL media, which resulted in 37.5 µg/mL of AN. For  
143 *A. afra* the MIC was the extract from 4.81 mg of dried leaves per mL media, which contained <1.3  
144 µg/mL of AN. These results show that *Artemisia* extracts inhibit Mtb growth to an extent that  
145 cannot be fully explained by their AN content. The MIC is used to evaluate the antimicrobial  
146 efficacy of antibiotics by measuring the bacteriostatic capability of a certain agent, but does not  
147 provide information on its bactericidal activity. Previous studies reported growth inhibition by *A.*  
148 *annua* and *A. afra* extracts in Mtb cultures (Cantrell et al., 1998; Mativandlela et al., 2008; Ntutela  
149 et al., 2009; Uba et al., 2003). However, the bactericidal activity of these extracts has to our  
150 knowledge not yet been reported. To investigate the potential of *A. annua* extract as a bactericidal  
151 agent, we treated Mtb mc<sup>2</sup>6230 cultures with concentrations above the MIC of *A. annua* extract  
152 and found that while AN alone was bactericidal, the extract produced more killing with faster  
153 kinetics than equivalent AN concentrations alone (Fig. 1A). In addition, a two-fold increase in  
154 pure AN concentration (150 µg/mL to 300 µg/mL) did not increase killing, while an equivalent  
155 increase in *A. annua* concentration remarkably potentiated bactericidal activity against Mtb (Fig  
156 1A). These data suggest that *A. annua* extract kills Mtb through a combination of AN and  
157 additional compounds present in the plant extract.

158 We further measured the potential of *A. afra* against Mtb mc<sup>2</sup>6230. We found that extracts of this  
159 plant exhibited bactericidal activity, although to a lesser extent than extracts of *A. annua* made  
160 from an equivalent mass of dried leaves (Fig 1B). Given the much lower levels of AN in *A. afra*  
161 compared to *A. annua*, this result suggests that the stronger bactericidal activity of *A. annua* may  
162 be due to the combination of AN and other plant compounds. However, we cannot rule out the  
163 possibility that the difference is due to differences in other aspects of the phytochemistry of the  
164 two species. It is important to highlight that the *A. afra* extract displayed significantly greater  
165 killing than pure AN at a concentration >30-fold higher than that present in the extract, which

166 reinforces the premise that other compounds present in *Artemisia* plants contribute to their  
167 bactericidal effects.

168 Similar bactericidal activities of *Artemisia* extracts were observed when the virulent Mtb Erdman  
169 strain was used (Fig 1C), although in this case AN prevented Mtb growth but did not display  
170 bactericidal activity. The differences in pure AN outcomes as well as the slightly lower killing  
171 observed for *Artemisia* extracts in Erdman compared to mc<sup>2</sup>6230 strain may be due to the different  
172 experimental conditions used in these assays (see Section 2.4). In addition, mc<sup>2</sup>6230 is a derivative  
173 of H37Rv, which has been shown to behave differently than Erdman strain in other aspects  
174 (Manabe et al., 2003; North and Izzo, 1993).

175 We also sought to evaluate the potential of *Artemisia* extracts against *M. abscessus*, a non-  
176 tuberculous mycobacterium causing severe infections in immunocompromised patients and whose  
177 treatment is very restricted due to the limited number of effective drugs. Interestingly, we found  
178 that pure AN and *A. afra* do not hamper *M. abscessus* growth, while *A. annua* showed  
179 bacteriostatic activity against this pathogen (Fig 2A). Although bactericidal activity is highly  
180 desirable, there is debate about the extent to which bactericidal drugs are better than bacteriostatic  
181 drugs to treat clinical infections (Nemeth et al., 2015; Pankey and Sabath, 2004; Rhee and  
182 Gardiner, 2004; Wald-Dickler et al., 2018). Antibiotic efficacy *in vivo* depends on many other  
183 factors such as drug combinations, pharmacodynamics, and pharmacokinetics (Rhee and Gardiner,  
184 2004). In addition, some antibiotics have been shown to exhibit bacteriostatic or bactericidal  
185 activity, depending on the bacterial growth phase or their interaction with other drugs (Bakker-  
186 Woudenberg et al., 2005; Lobritz et al., 2015; Yamori et al., 1992; Zhang et al., 2014).  
187 Bacteriostatic antibiotics are effective in treating *M. abscessus* and other mycobacterial infections  
188 and their use is also important in preventing emergence of drug resistance (Ferro et al., 2016;  
189 Vilchèze and Jacobs, 2012) especially when pharmacological options are limited. Thus, we  
190 propose that *A. annua* has potential to treat *M. abscessus* infections and warrants further study.

191 We finally investigated the effect of *A. annua* extract against *M. smegmatis*, a fast-growing non-  
192 pathogenic mycobacterium widely used as a model system to study many aspects of Mtb  
193 physiology. We found that, while growth was significantly affected, neither pure AN nor the



194 extract have the ability to fully inhibit growth or kill this organism at the concentrations tested (Fig  
195 2B).

196

#### 197 **4. CONCLUSIONS**

198 The strong bactericidal effect of *A. annua* and *A. afra* extracts against Mtb and the bacteriostatic  
199 activity of *A. annua* against *M. abscessus* point out the enormous potential of these extracts, or  
200 compounds within them, to treat mycobacterial infections. The stronger killing activity of *A. annua*  
201 compared to pure AN at equivalent concentrations and the moderate killing of *A. afra* suggest that  
202 other metabolites are important for these bactericidal activities, making these plants an excellent  
203 alternative to the use of pure AN. Another aspect to be considered is that using *A. annua* extracts  
204 for TB treatment could potentially increase the bioavailability of AN, as we previously observed  
205 for malaria treatment in a rat model (Desrosiers et al., 2020). In addition, the implementation of  
206 *Artemisia* extracts in Mtb and *M. abscessus* infections treatment could slow down or prevent the  
207 emergence of resistance to other drugs. Further study is needed to identify the active  
208 phytochemicals in these extracts and evaluate their potential as antitubercular drugs. Additionally,  
209 our study focused on plant extracts made with a single solvent. Other solvents should be tested to  
210 evaluate the potential of compounds that are not efficiently extracted by DCM.

211

#### 212 **AUTHOR CONTRIBUTIONS**

213 M.C.M., S.S.S., P.J.W., and R.B.A. conceived and designed experiments. T.Z. prepared plant  
214 extracts. M.C.M., T.Z., and J.T.W. performed antimycobacterial activity assays. M.C.M. and  
215 S.S.S. wrote the manuscript.

216

#### 217 **ACKNOWLEDGEMENTS**

218 This work was funded in part by R01AI116605 (to RBA) and phytochemical analysis was funded  
219 by the National Center for Complementary and Integrative Health, award number NIH-



220 2R15AT008277-02 (to PW). The content is solely the responsibility of the authors and does not  
221 necessarily represent the official views of the National Center for Complementary and Integrative  
222 Health or the National Institutes of Health. We thank Melissa Towler for assistance with  
223 quantification of the artemisinin content in plant extracts. We thank Guy Mergei for providing *A.*  
224 *afra* plant material. We thank members of the Shell and Weathers labs for technical assistance and  
225 helpful discussions.

226

## 227 REFERENCES

- 228 Bakker-Woudenberg, I.A., van Vianen, W., van Soolingen, D., Verbrugh, H.A., van Agtmael,  
229 M.A., 2005. Antimycobacterial agents differ with respect to their bacteriostatic versus  
230 bactericidal activities in relation to time of exposure, mycobacterial growth phase, and their use  
231 in combination. *Antimicrobial agents and chemotherapy* 49(6), 2387-2398.
- 232 Barberis, I., Bragazzi, N.L., Galluzzo, L., Martini, M., 2017. The history of tuberculosis: from  
233 the first historical records to the isolation of Koch's bacillus. *J Prev Med Hyg* 58(1), E9-E12.
- 234 Cantrell, C., Fischer, N., Urbatsch, L., McGuire, M., Franzblau, S., 1998. Antimycobacterial  
235 crude plant extracts from South, Central, and North America. *Phytomedicine* 5(2), 137-145.
- 236 Choi, W.H., 2017. Novel pharmacological activity of artesunate and artemisinin: Their potential  
237 as anti-tubercular agents. *Journal of clinical medicine* 6(3), 30.
- 238 Desrosiers, M.R., Mittelman, A., Weathers, P.J., 2020. Dried Leaf *Artemisia Annu*a Improves  
239 Bioavailability of Artemisinin via Cytochrome P450 Inhibition and Enhances Artemisinin  
240 Efficacy Downstream. *Biomolecules* 10(2), 254.
- 241 Ferro, B.E., Meletiadiis, J., Wattenberg, M., De Jong, A., van Soolingen, D., Mouton, J.W., van  
242 Ingen, J., 2016. Clofazimine prevents the regrowth of *Mycobacterium abscessus* and  
243 *Mycobacterium avium* type strains exposed to amikacin and clarithromycin. *Antimicrobial*  
244 *agents and chemotherapy* 60(2), 1097-1105.
- 245 Keam, S.J., 2019. Pretomanid: First Approval. *Drugs* 79(16), 1797-1803.
- 246 Lee, M., Lee, J., Carroll, M.W., Choi, H., Min, S., Song, T., Via, L.E., Goldfeder, L.C., Kang,  
247 E., Jin, B., Park, H., Kwak, H., Kim, H., Jeon, H.S., Jeong, I., Joh, J.S., Chen, R.Y., Olivier,  
248 K.N., Shaw, P.A., Follmann, D., Song, S.D., Lee, J.K., Lee, D., Kim, C.T., Dartois, V., Park,  
249 S.K., Cho, S.N., Barry, C.E., 3rd, 2012. Linezolid for treatment of chronic extensively drug-  
250 resistant tuberculosis. *N Engl J Med* 367(16), 1508-1518.
- 251 Lobritz, M.A., Belenky, P., Porter, C.B., Gutierrez, A., Yang, J.H., Schwarz, E.G., Dwyer, D.J.,  
252 Khalil, A.S., Collins, J.J., 2015. Antibiotic efficacy is linked to bacterial cellular respiration.  
253 *Proceedings of the National Academy of Sciences* 112(27), 8173-8180.
- 254 Manabe, Y.C., Dannenberg, A.M., Tyagi, S.K., Hatem, C.L., Yoder, M., Woolwine, S.C., Zook,  
255 B.C., Pitt, M.L.M., Bishai, W.R., 2003. Different strains of *Mycobacterium tuberculosis* cause

- 256 various spectrums of disease in the rabbit model of tuberculosis. *Infection and immunity* 71(10),  
257 6004-6011.
- 258 Mativandlela, S.P.N., Meyer, J.J.M., Hussein, A.A., Houghton, P.J., Hamilton, C.J., Lall, N.,  
259 2008. Activity against *Mycobacterium smegmatis* and *M. tuberculosis* by extract of South  
260 African medicinal plants. *Phytotherapy Research: An International Journal Devoted to*  
261 *Pharmacological and Toxicological Evaluation of Natural Product Derivatives* 22(6), 841-845.
- 262 Mokrousov, I., Akhmedova, G., Poley, D., Molchanov, V., Vyazovaya, A., 2019. Acquisition of  
263 bedaquiline resistance by extensively drug-resistant *Mycobacterium tuberculosis* strain of  
264 Central Asian Outbreak clade. *Clinical Microbiology and Infection* 25(10), 1295-1297.
- 265 Munyangi, J., Cornet-Vernet, L., Idumbo, M., Lu, C., Lutgen, P., Perronne, C., Ngombe, N.,  
266 Bianga, J., Mupenda, B., Lalukala, P., Mergeai, G., Mumba, D., Towler, M., Weathers, P., 2018.  
267 Effect of *Artemisia annua* and *Artemisia afra* tea infusions on schistosomiasis in a large clinical  
268 trial. *Phytomedicine* 51, 233-240.
- 269 Nemeth, J., Oesch, G., Kuster, S.P., 2015. Bacteriostatic versus bactericidal antibiotics for  
270 patients with serious bacterial infections: systematic review and meta-analysis. *Journal of*  
271 *Antimicrobial Chemotherapy* 70(2), 382-395.
- 272 North, R.J., Izzo, A.A., 1993. *Mycobacterial virulence. Virulent strains of Mycobacteria*  
273 *tuberculosis have faster in vivo doubling times and are better equipped to resist growth-*  
274 *inhibiting functions of macrophages in the presence and absence of specific immunity. The*  
275 *Journal of experimental medicine* 177(6), 1723-1733.
- 276 Ntutela, S., Smith, P., Matika, L., Mukinda, J., Arendse, H., Allie, N., Estes, D.M., Mabusela,  
277 W., Folb, P., Steyn, L., 2009. Efficacy of *Artemisia afra* phytotherapy in experimental  
278 tuberculosis. *Tuberculosis* 89, S33-S40.
- 279 Osborne, R., 2013. First novel anti-tuberculosis drug in 40 years. Nature Publishing Group.
- 280 Pankey, G., Sabath, L., 2004. Clinical relevance of bacteriostatic versus bactericidal mechanisms  
281 of action in the treatment of Gram-positive bacterial infections. *Clinical infectious diseases*  
282 38(6), 864-870.
- 283 Patel, Y.S., Mistry, N., Mehra, S., 2019. Repurposing artemisinin as an anti-mycobacterial agent  
284 in synergy with rifampicin. *Tuberculosis (Edinb)* 115, 146-153.
- 285 Polsfuss, S., Hofmann-Thiel, S., Merker, M., Krieger, D., Niemann, S., Rüssmann, H.,  
286 Schönfeld, N., Hoffmann, H., Kranzer, K., 2019. Emergence of low-level delamanid and  
287 bedaquiline resistance during extremely drug-resistant tuberculosis treatment. *Clinical Infectious*  
288 *Diseases* 69(7), 1229-1231.
- 289 Rhee, K.Y., Gardiner, D.F., 2004. Clinical relevance of bacteriostatic versus bactericidal activity  
290 in the treatment of gram-positive bacterial infections. *Clinical infectious diseases* 39(5), 755-756.
- 291 Ryan, N.J., Lo, J.H., 2014. Delamanid: first global approval. *Drugs* 74(9), 1041-1045.
- 292 Sambandamurthy, V.K., Derrick, S.C., Hsu, T., Chen, B., Larsen, M.H., Jalapathy, K.V., Chen,  
293 M., Kim, J., Porcelli, S.A., Chan, J., Morris, S.L., Jacobs, J., William R., 2006. *Mycobacterium*  
294 *tuberculosis*  $\Delta$ RD1  $\Delta$ panCD: A safe and limited replicating mutant strain that protects  
295 immunocompetent and immunocompromised mice against experimental tuberculosis. *Vaccine*  
296 24(37-39), 6309-6320.

- 297 Thring, T.S., Weitz, F.M., 2006. Medicinal plant use in the Bredasdorp/Elim region of the  
298 Southern Overberg in the Western Cape Province of South Africa. *J Ethnopharmacol* 103(2),  
299 261-275.
- 300 Towler, M.J., Weathers, P.J., 2015. Variations in key artemisinin and other metabolites  
301 throughout plant development in *Artemisia annua* L. for potential therapeutic use. *Ind Crops*  
302 *Prod* 67, 185-191.
- 303 Uba, A., Ibrahim, K., Agbo, E., Makinde, A., 2003. In vitro inhibition of *Mycobacterium*  
304 *smegmatis* and *Mycobacterium tuberculosis* by some Nigerian Medicinal Plants. *East and*  
305 *Central African Journal of Pharmaceutical Sciences* 6(1), 15-19.
- 306 Vilchèze, C., Jacobs, W.R., 2012. The combination of sulfamethoxazole, trimethoprim, and  
307 isoniazid or rifampin is bactericidal and prevents the emergence of drug resistance in  
308 *Mycobacterium tuberculosis*. *Antimicrobial agents and chemotherapy* 56(10), 5142-5148.
- 309 Wald-Dickler, N., Holtom, P., Spellberg, B., 2018. Busting the myth of “static vs cidal”: a  
310 systemic literature review. *Clinical Infectious Diseases* 66(9), 1470-1474.
- 311 Weathers, P.J., Jordan, N.J., Lasin, P., Towler, M.J., 2014. Simulated digestion of dried leaves of  
312 *Artemisia annua* consumed as a treatment (pACT) for malaria. *Journal of ethnopharmacology*  
313 151(2), 858-863.
- 314 Weathers, P.J., Towler, M.J., 2014. Changes in key constituents of clonally propagated  
315 *Artemisia annua* L. during preparation of compressed leaf tablets for possible therapeutic use.  
316 *Ind Crops Prod* 62, 173-178.
- 317 WHO, 2019. Global tuberculosis report.
- 318 Yamori, S., Ichiyama, S., Shimokata, K., Tsukamura, M., 1992. Bacteriostatic and bactericidal  
319 activity of antituberculosis drugs against *Mycobacterium tuberculosis*, *Mycobacterium avium-*  
320 *Mycobacterium intracellulare* complex and *Mycobacterium kansasii* in different growth phases.  
321 *Microbiology and immunology* 36(4), 361-368.
- 322 Zhang, M., Sala, C., Dhar, N., Vocat, A., Sambandamurthy, V.K., Sharma, S., Marriner, G.,  
323 Balasubramanian, V., Cole, S.T., 2014. In vitro and in vivo activities of three oxazolidinones  
324 against nonreplicating *Mycobacterium tuberculosis*. *Antimicrobial agents and chemotherapy*  
325 58(6), 3217-3223.
- 326 Zheng, H., Colvin, C.J., Johnson, B.K., Kirchhoff, P.D., Wilson, M., Jorgensen-Muga, K.,  
327 Larsen, S.D., Abramovitch, R.B., 2017. Inhibitors of *Mycobacterium tuberculosis* DosRST  
328 signaling and persistence. *Nature chemical biology* 13(2), 218.
- 329 Zheng, H., Williams, J.T., Aleiwi, B., Ellsworth, E., Abramovitch, R.B., 2019. Inhibiting  
330 *Mycobacterium tuberculosis* DosRST Signaling by Targeting Response Regulator DNA Binding  
331 and Sensor Kinase Heme. *ACS chemical biology*.
- 332
- 333
- 334
- 335
- 336

337 **FIGURES**

338

339

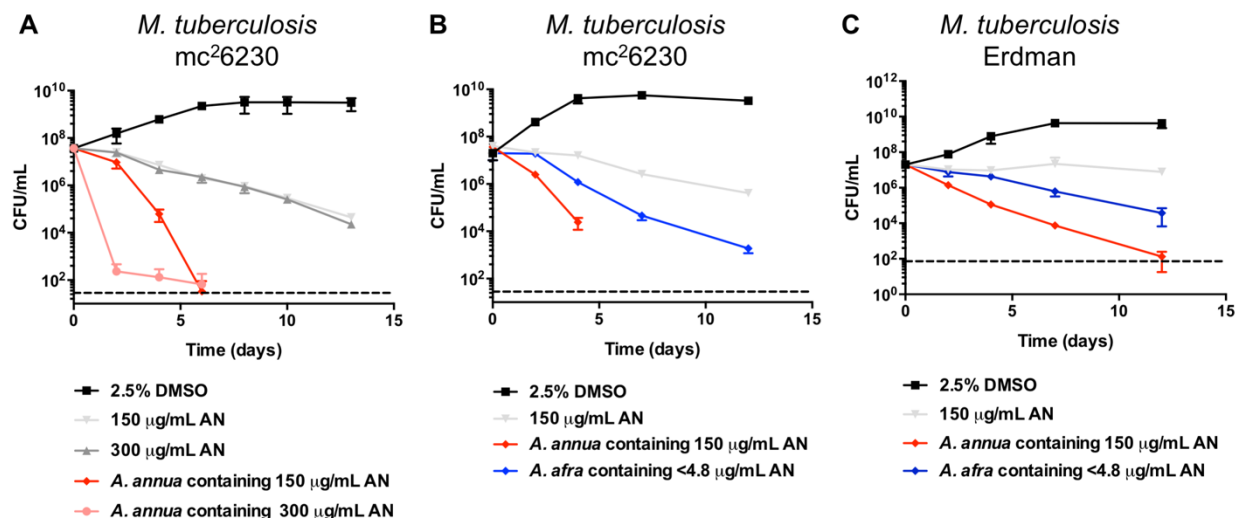

340

341

342 **Figure 1. Artemisia extracts exhibit strong bactericidal activity against *M. tuberculosis*.** A. *M.*

343 *tuberculosis* mc<sup>2</sup>6230 was incubated in the presence of 150 µg/mL or 300 µg/mL of pure AN, or

344 *A. annua* extract containing equivalent concentrations of AN. B and C. *M. tuberculosis* mc<sup>2</sup>6230

345 (B) or Erdman (C) was exposed to 150 µg/mL of pure AN or *A. annua* extract containing

346 equivalent concentrations of AN or *A. afra* at equivalent dry weight as the *A. annua* extract. 2.5%

347 DMSO was included as a control.

348

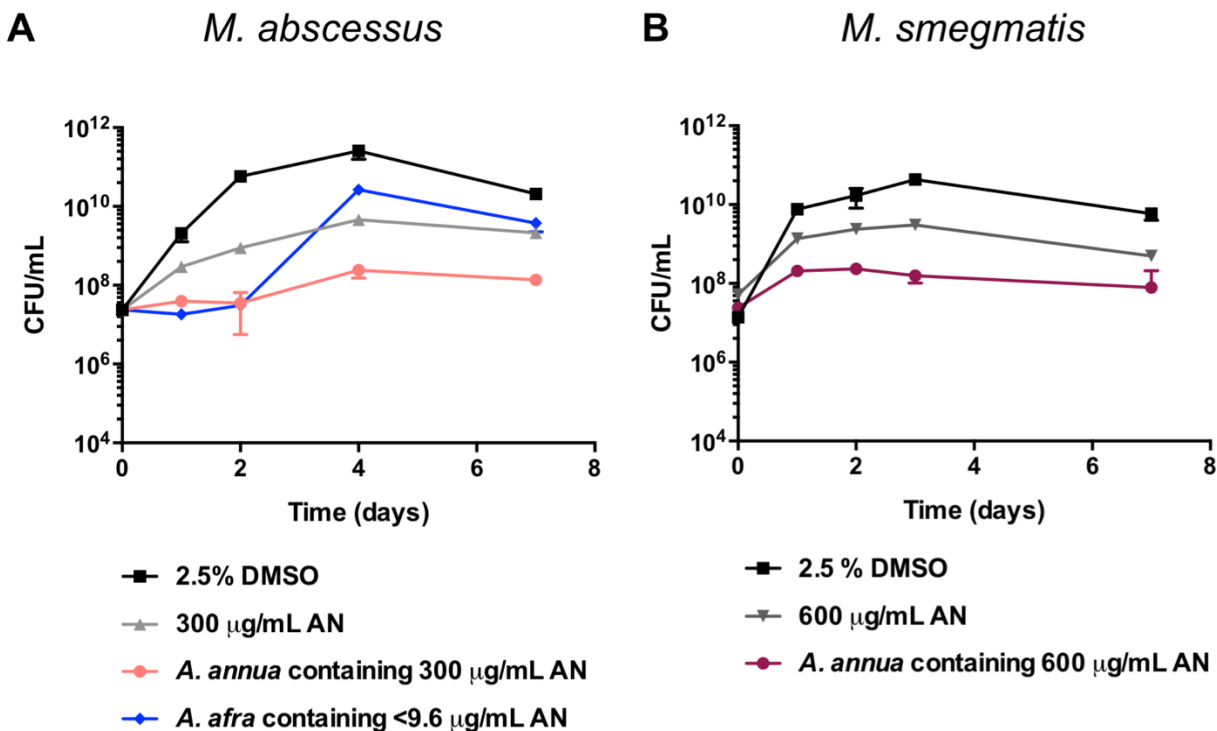

349

350

351 **Figure 2. *Artemisia* extracts have different impacts on *M. abscessus* and *M. smegmatis*.** The  
352 strains were incubated in presence of 300 µg/mL (A) or 600 µg/mL (B) of pure AN, or *A. annua*  
353 extract containing equivalent concentrations of AN, or *A. afra* at equivalent dry weight as the *A.*  
354 *annua* extract. 2.5% DMSO was included as a control.

355
